# Supplementary material for: Effects of myocardial ischemia/reperfusion injury on plasma metabolomic profile during aging
Source: PubMed Central journal article supplement (PMC7811846; doi:10.1111/acel.13284), 2020-12-29

# Suppl. Figure 1:

B-MODE

M-MODE

**A**

Sham\_Young

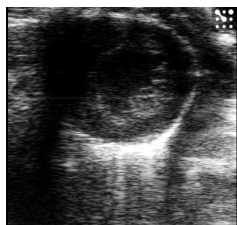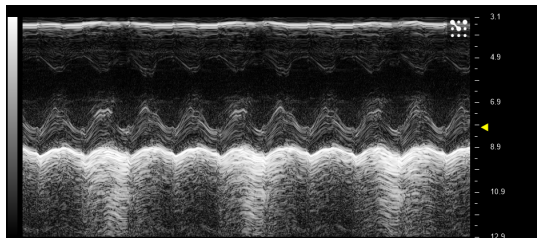

**B**

Sham\_Old

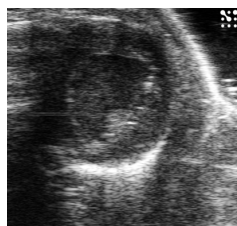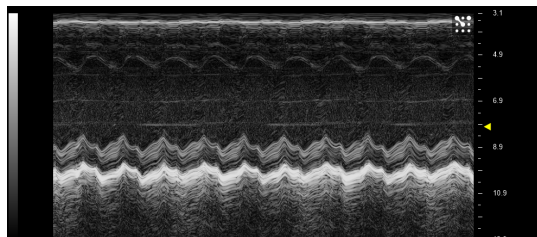

**C**

I/R\_Young

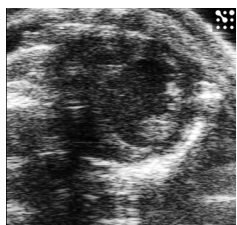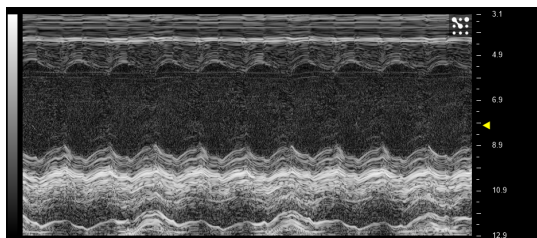

**D**

I/R\_Old

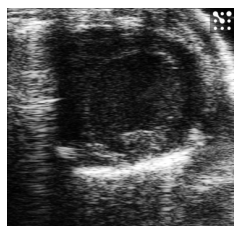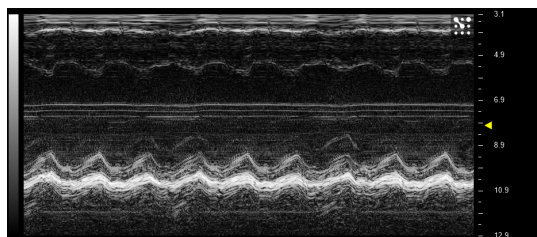

# Suppl. Figure 2:

## A

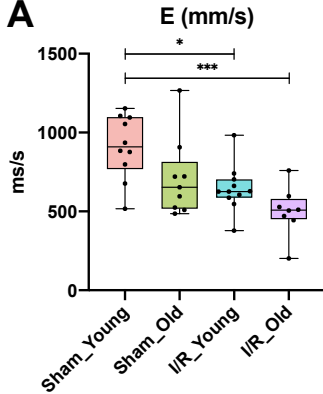

## B

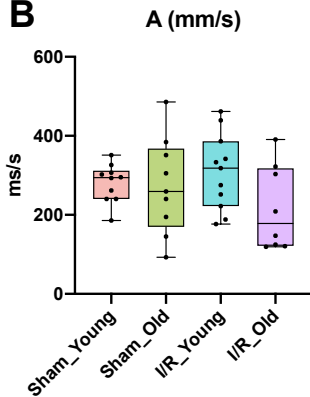

## C

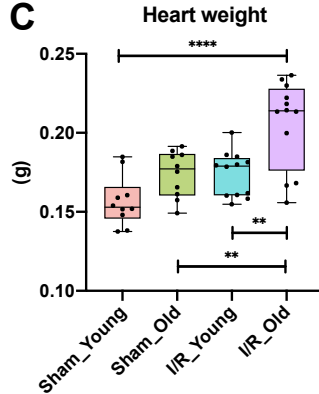

## D

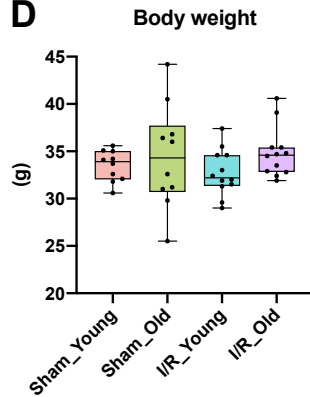

# Suppl. Figure 3:

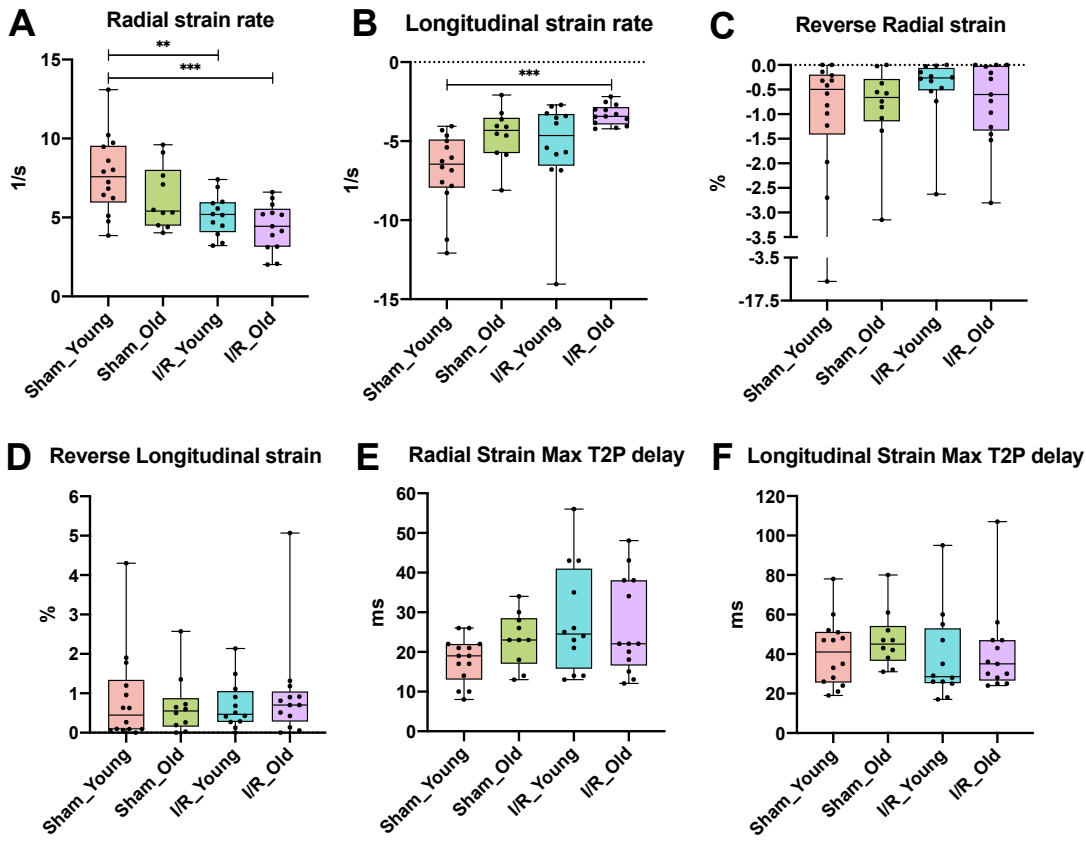

# Suppl. Figure 4:

**A**

Positive mode

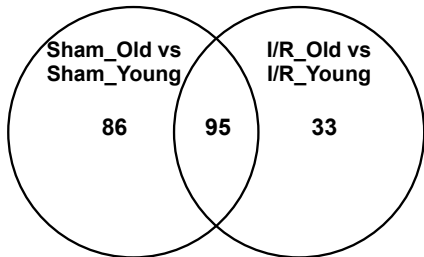

**B**

Negative mode

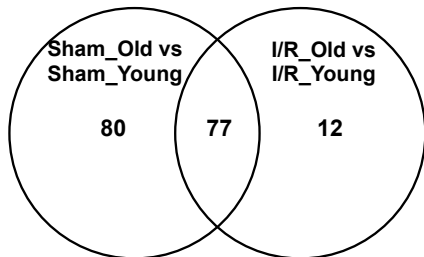

# Suppl. Figure 5:

Sham\_Young Sham\_Old I/R\_Young I/R\_Old

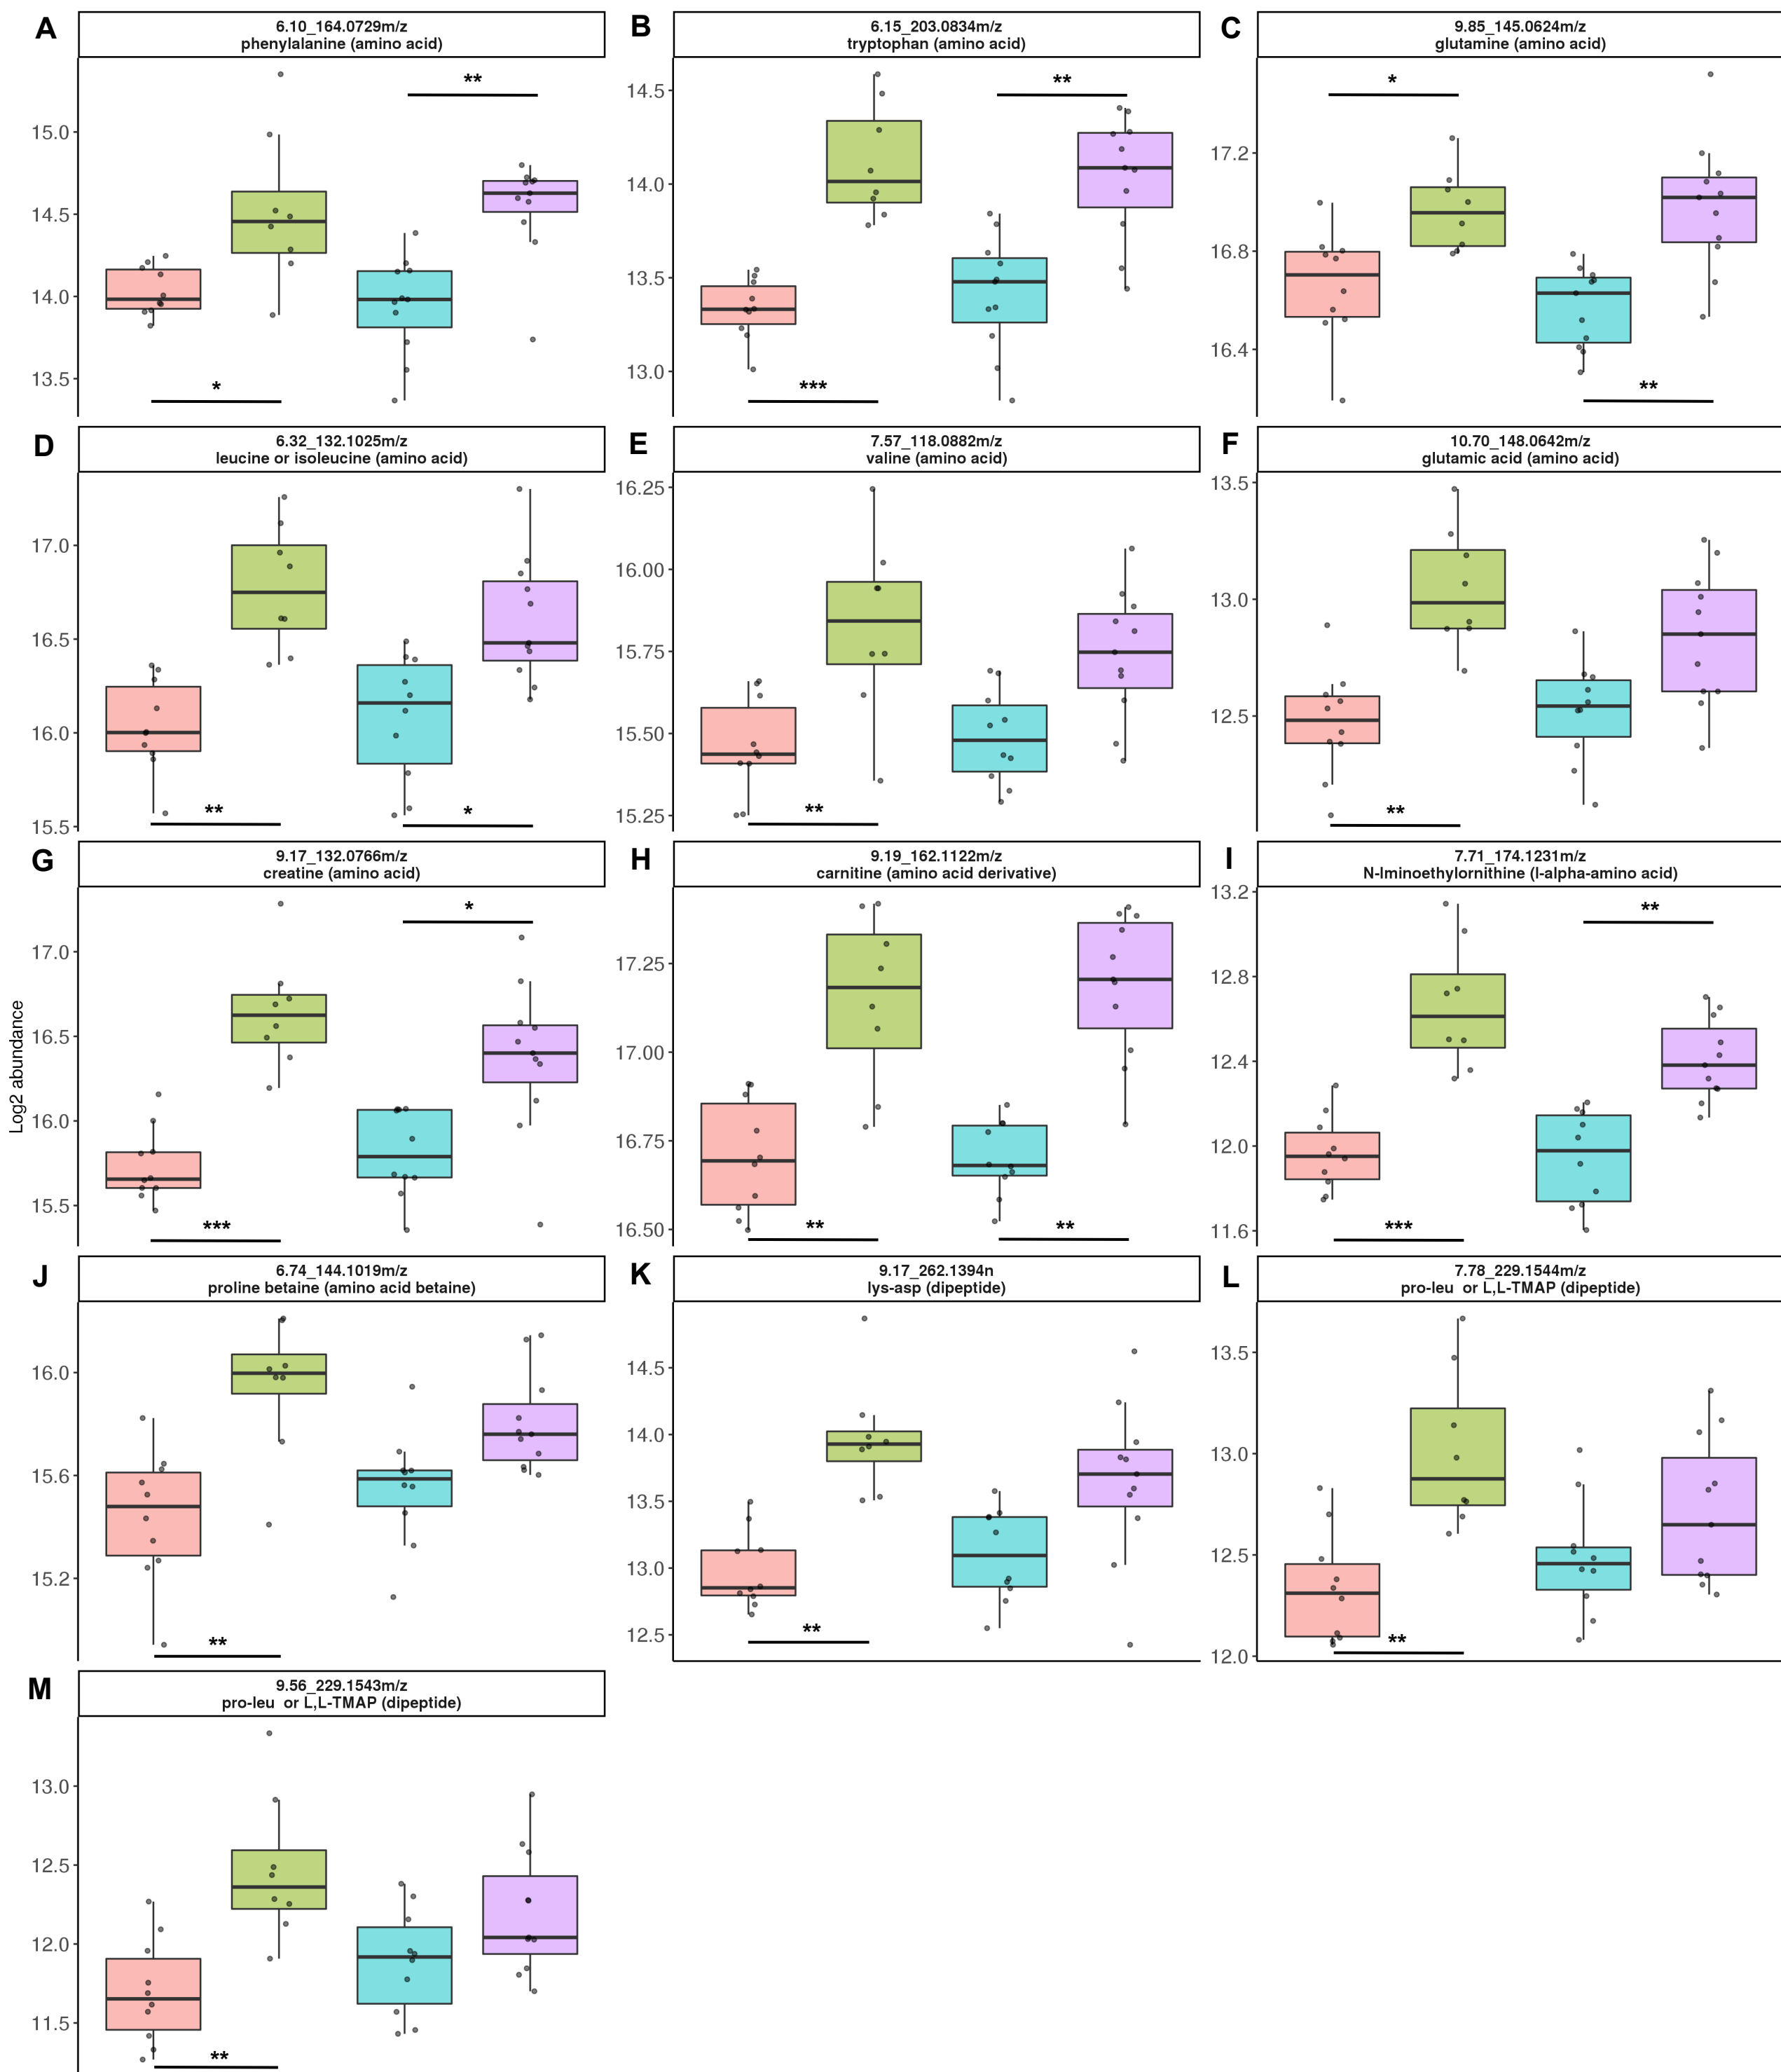



# Suppl. Figure 7:

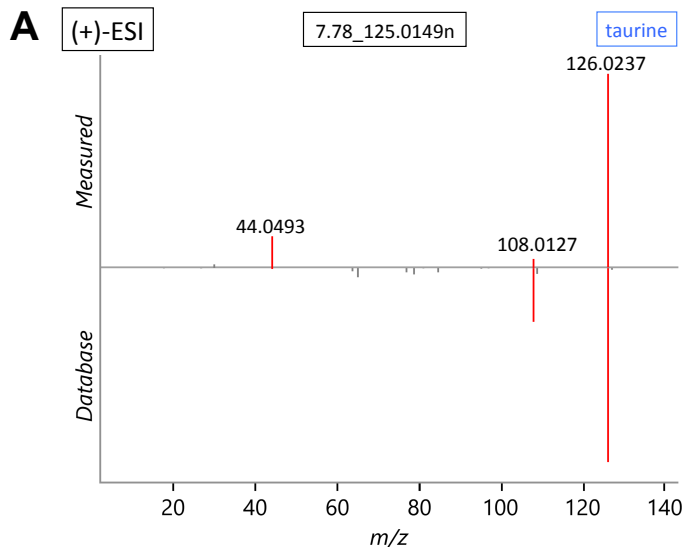

Legend: ■ Matched fragment ■ Unmatched fragment

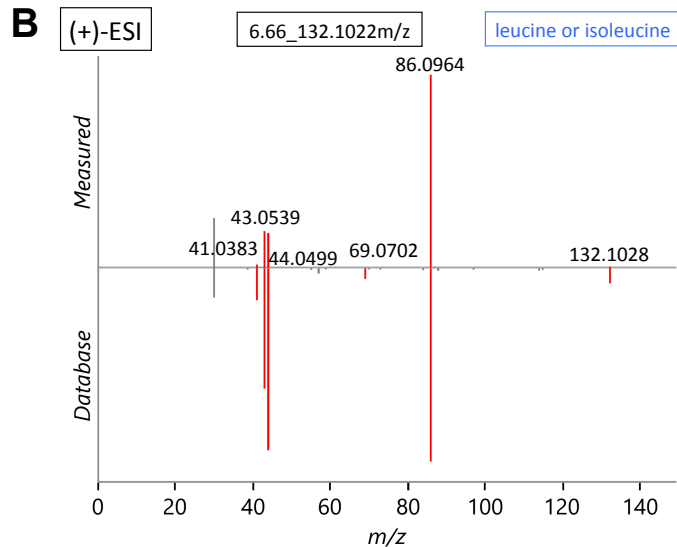

Legend: ■ Matched fragment ■ Unmatched fragment

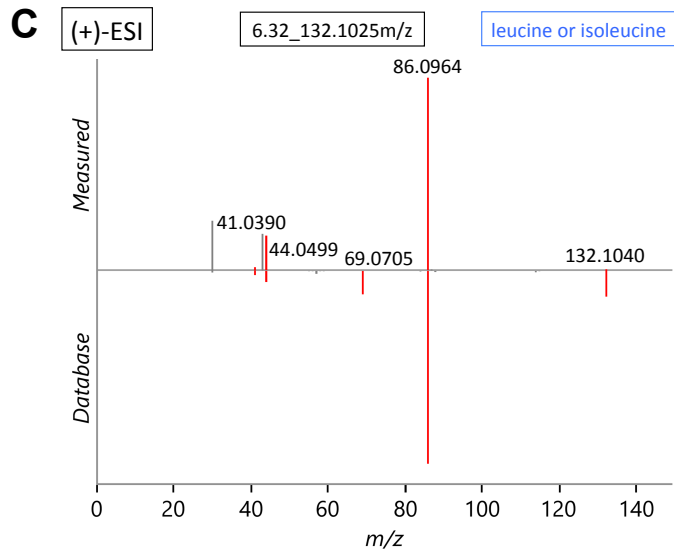

Legend: ■ Matched fragment ■ Unmatched fragment

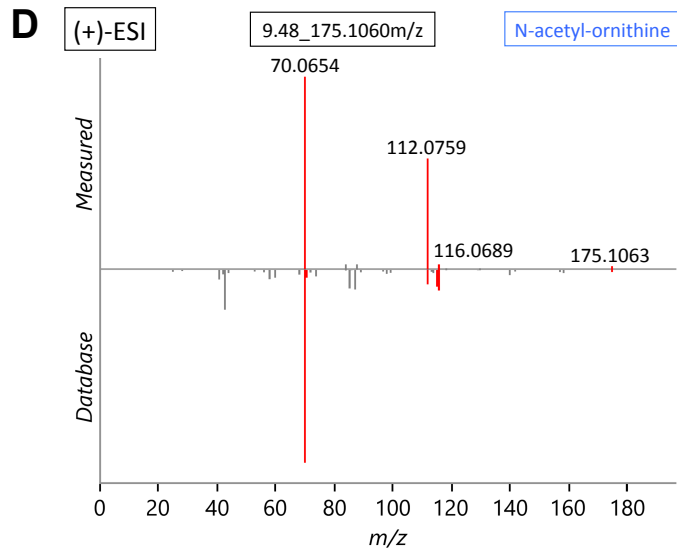

Legend: ■ Matched fragment ■ Unmatched fragment

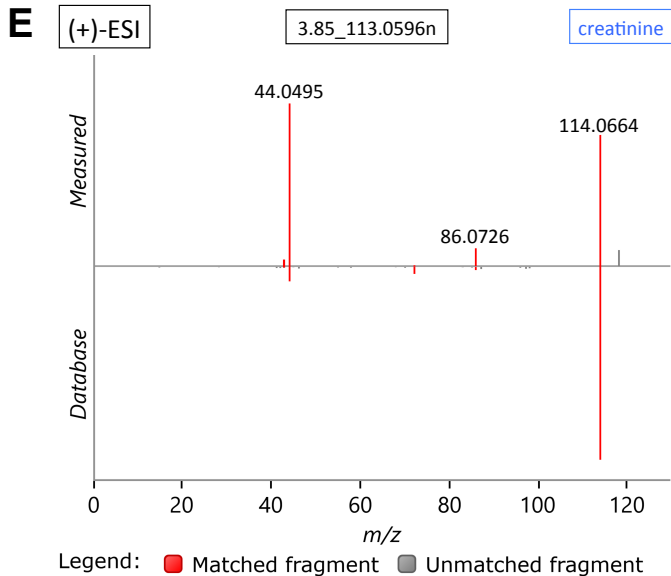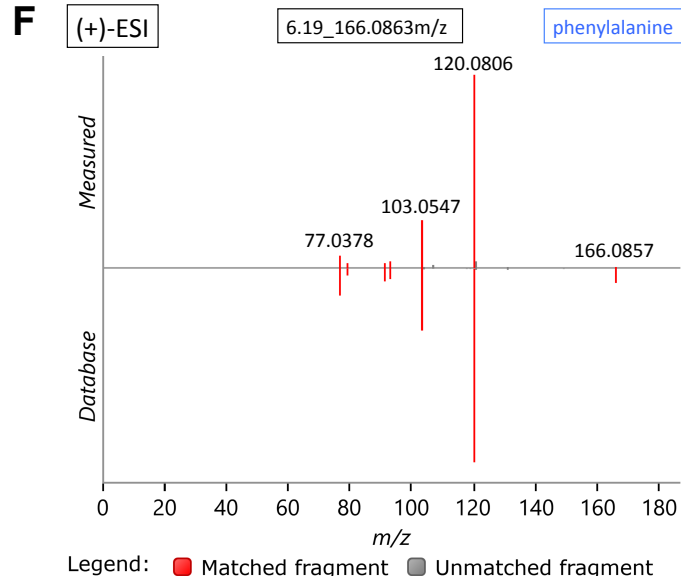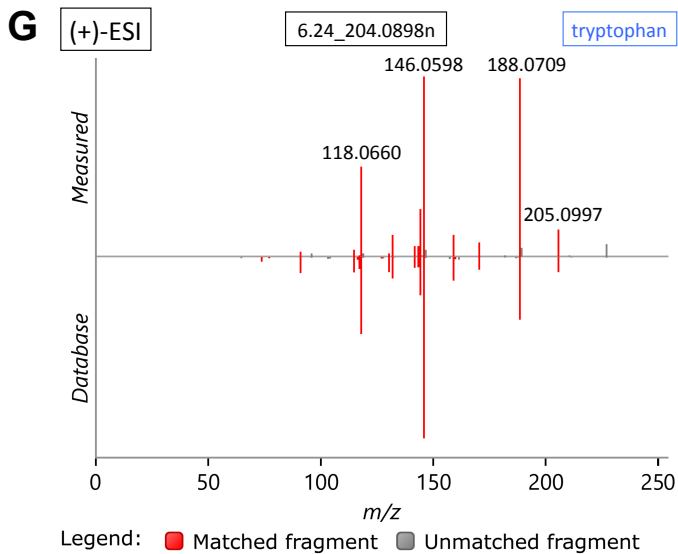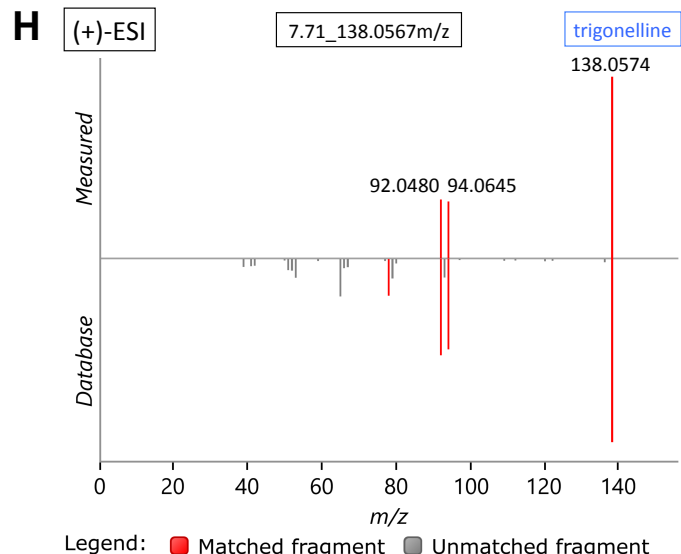



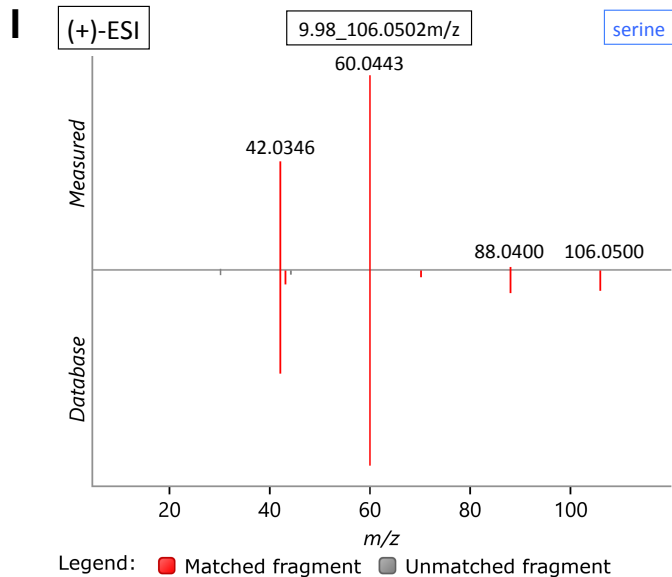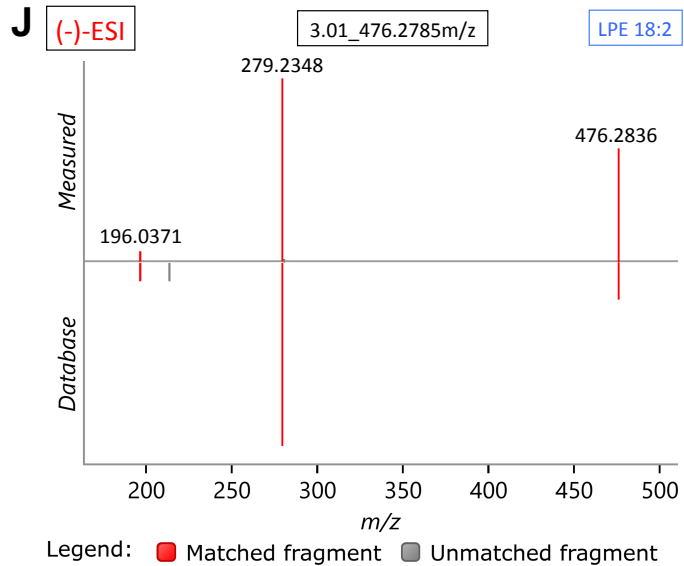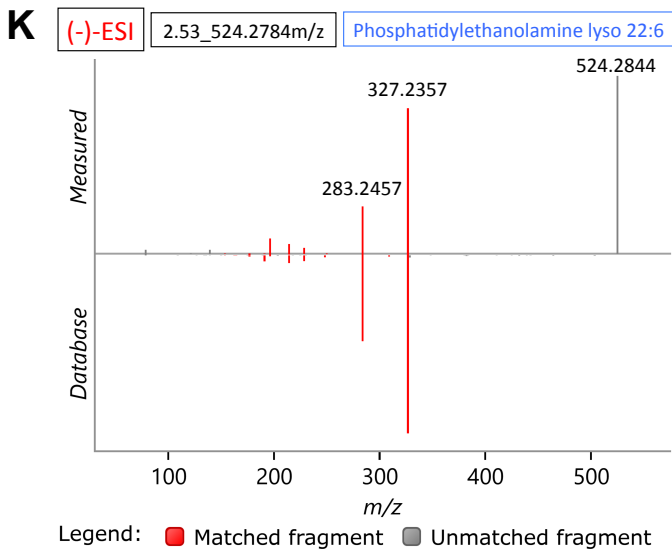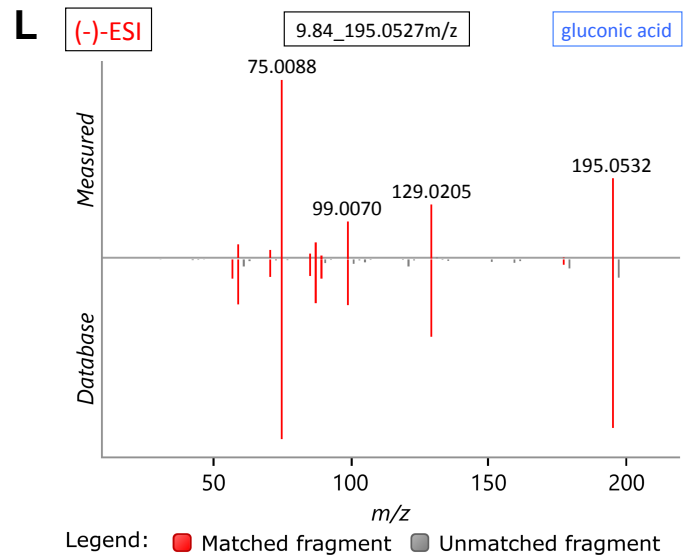

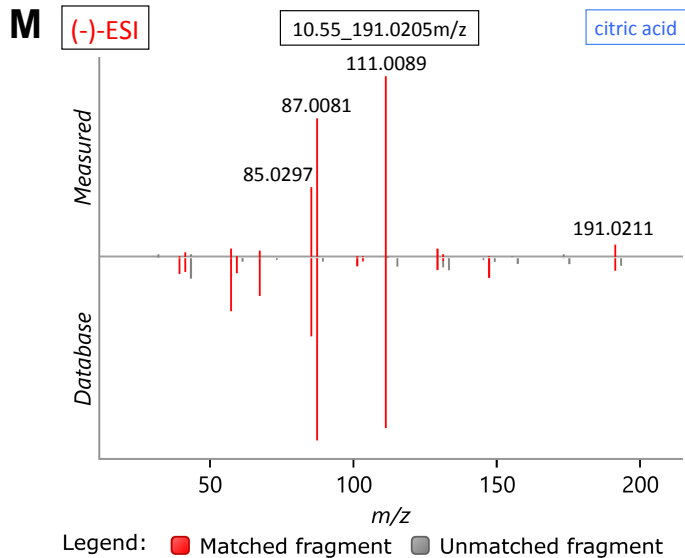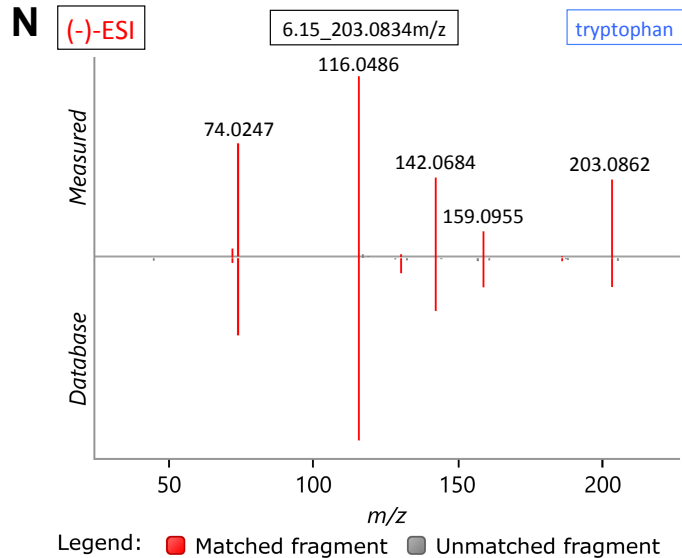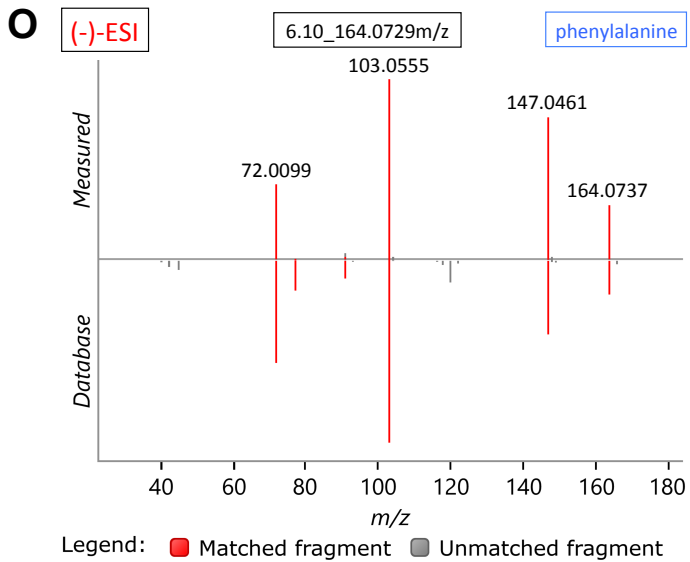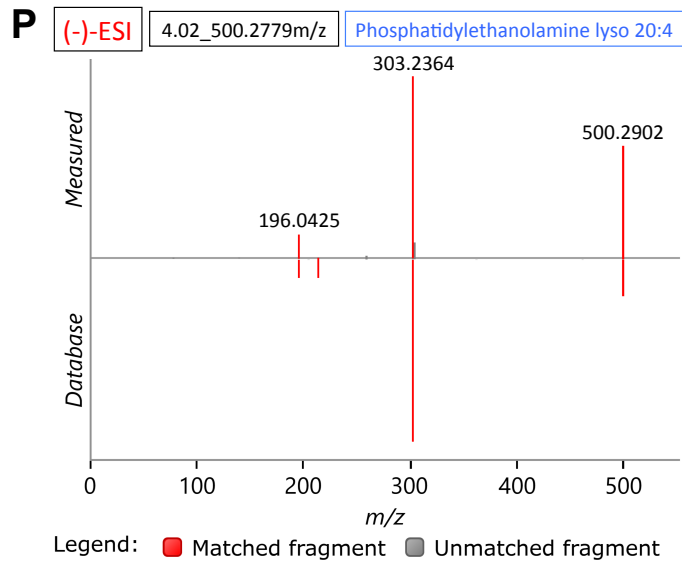

**Q**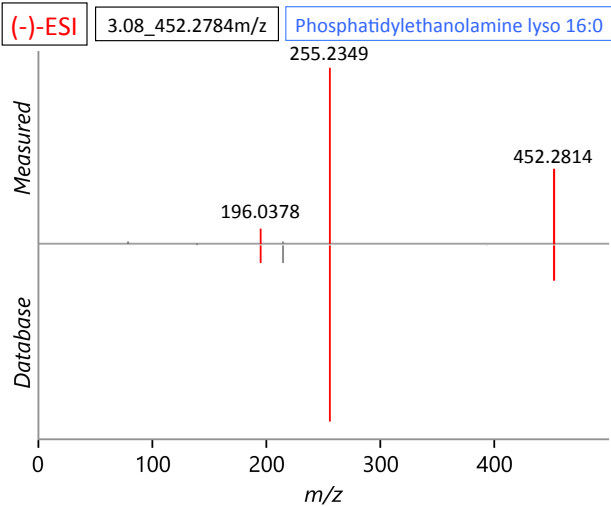**R**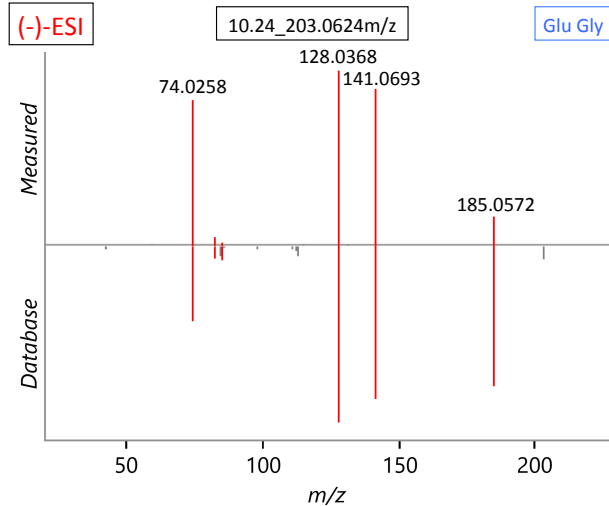

## Suppl. Figure 8:

**A** Negative mode:  
Sham\_Old\_vs\_Sham\_Young

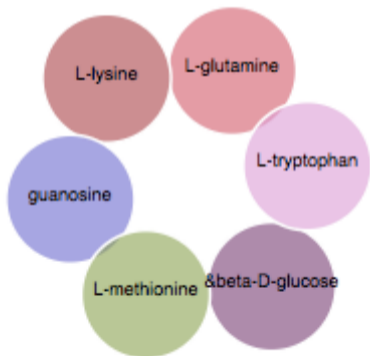

**B** Positive mode  
I/R\_Old\_vs\_I/R\_Young

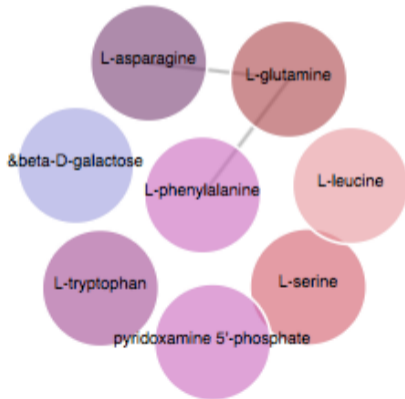

**C** Negative  
I/R\_Old\_vs\_I/R\_Young

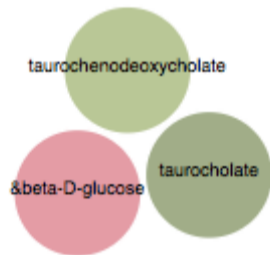

# Suppl. Figure 9:

## A positive Ejection.fraction

group ▲ Sham\_Young ■ Sham\_Old × I/R\_Young ● I/R\_Old Ejection.fraction 20 40 60

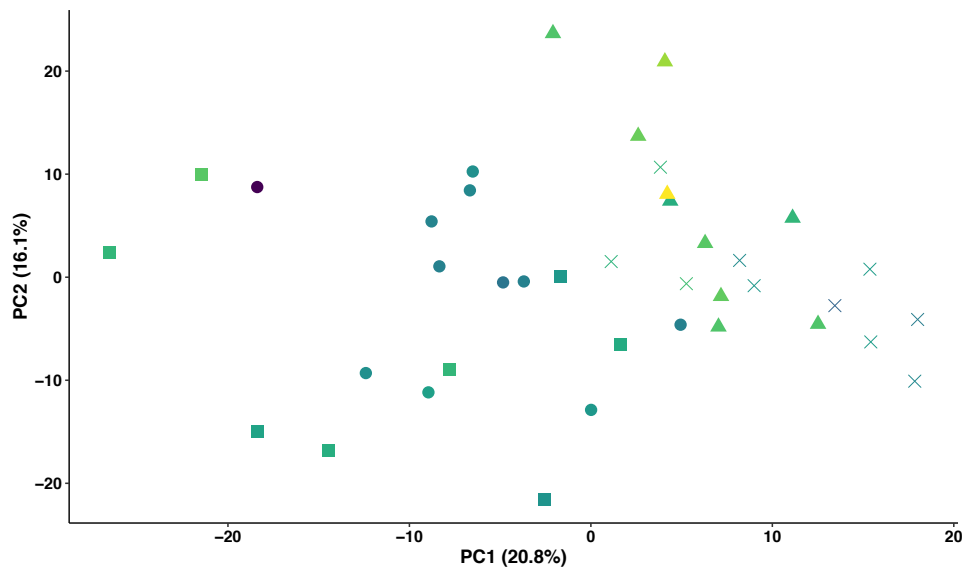

## B positive LVIDd

LVIDd 4 5 6 group ▲ Sham\_Young ■ Sham\_Old × I/R\_Young ● I/R\_Old

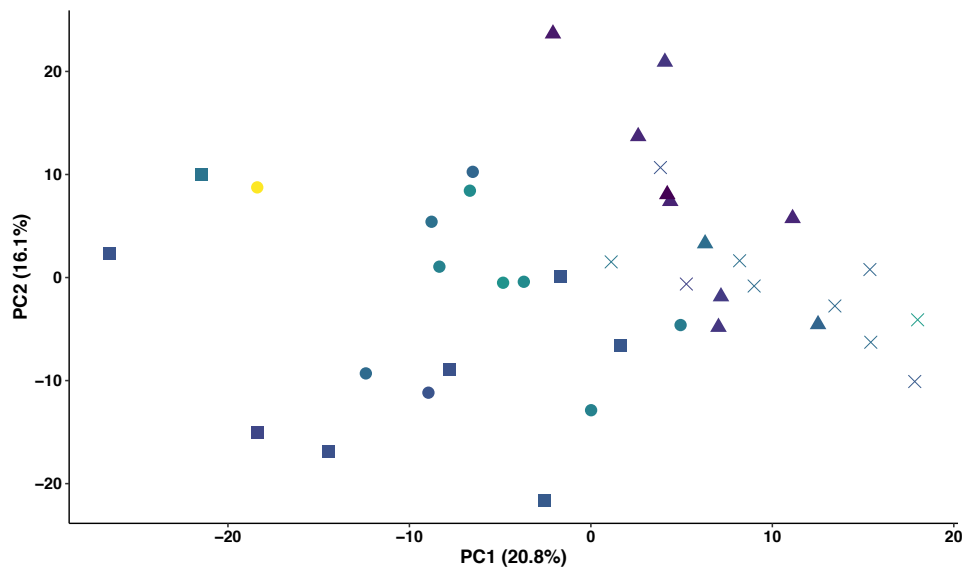

**C** positive Reverse.Radial.Strain.RateReverse.Radial.Strain.Rate  
-12 -9 -6

group ▲ Sham\_Young ■ Sham\_Old × I/R\_Young ● I/R\_Old

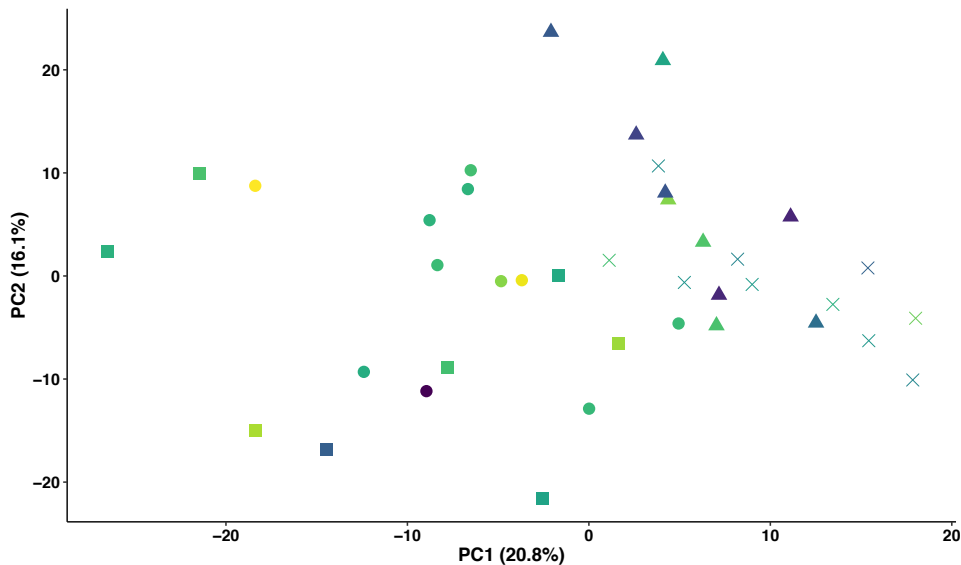**D** positive Reverse.Longitudinal.Strain.RateReverse.Longitudinal.Strain.Rate  
4 6 8 10

group ▲ Sham\_Young ■ Sham\_Old × I/R\_Young ● I/R\_Old

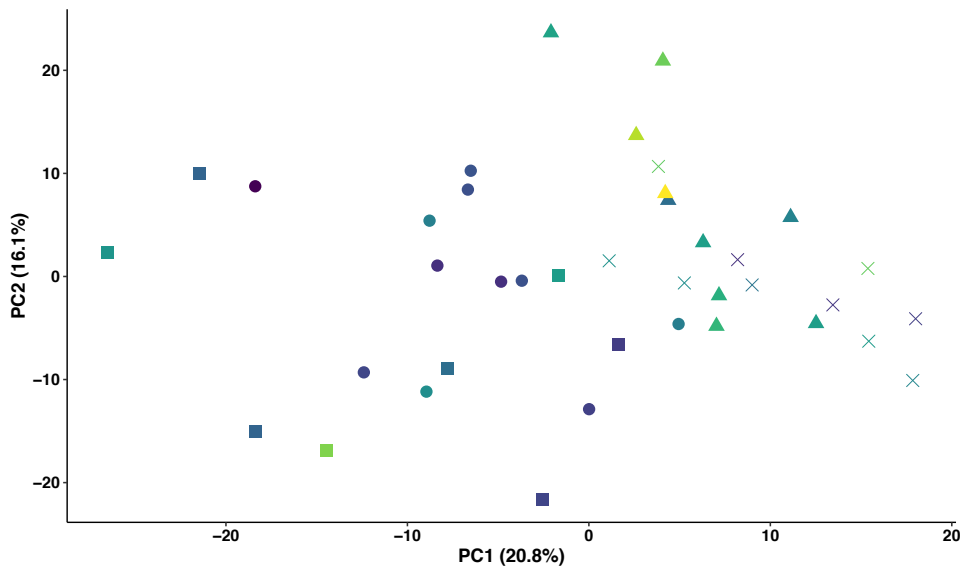

# E positive HW\_BW

group ▲ Sham\_Young ■ Sham\_Old × I/R\_Young ● I/R\_Old

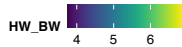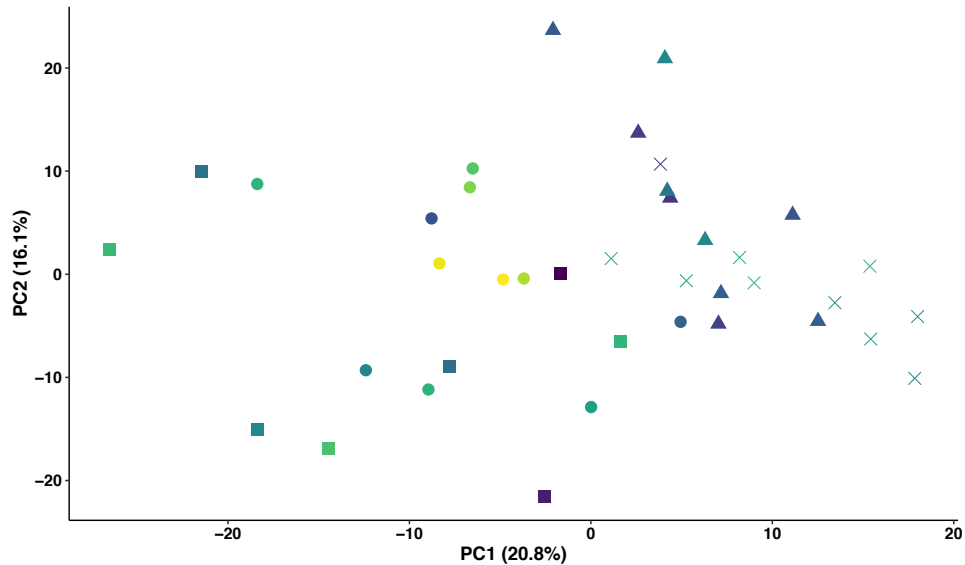

# Suppl. Figure 10:

## A negative Ejection.fraction

group ▲ Sham\_Young ■ Sham\_Old × I/R\_Young ● I/R\_Old

Ejection.fraction  20 40 60

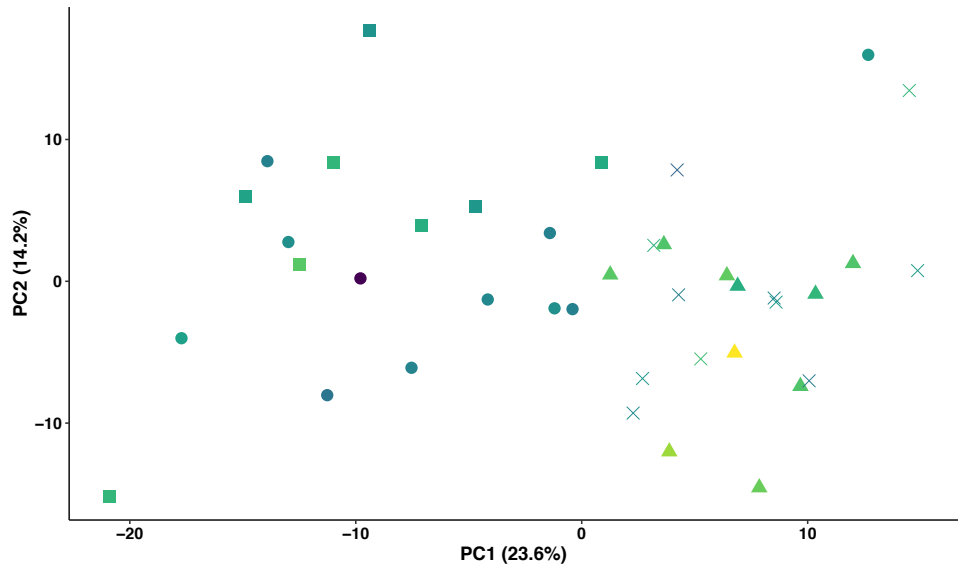

## B negative LVIDd

LVIDd  4 5 6

group ▲ Sham\_Young ■ Sham\_Old × I/R\_Young ● I/R\_Old

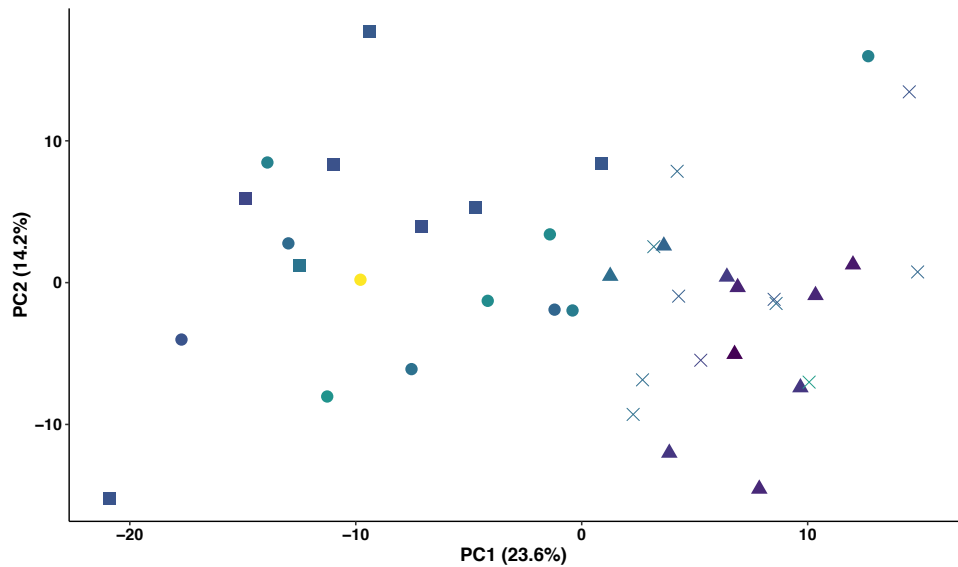





# E negative HW\_BW

group ▲ Sham\_Young ■ Sham\_Old × I/R\_Young ● I/R\_Old

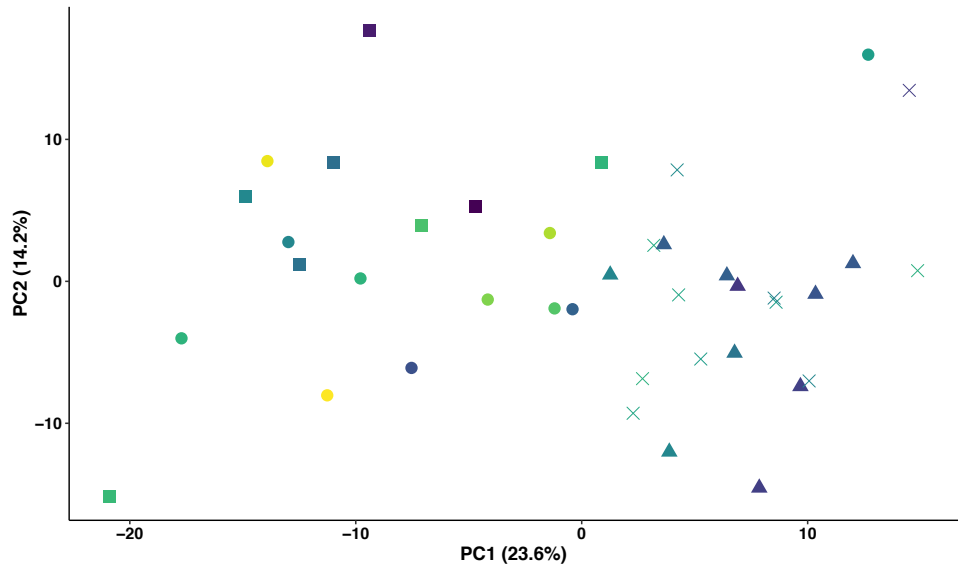

# Suppl. Figure 11:

## A Ejection fraction, I/R\_Old group

group Sham\_Young Sham\_Old I/R\_Young I/R\_Old

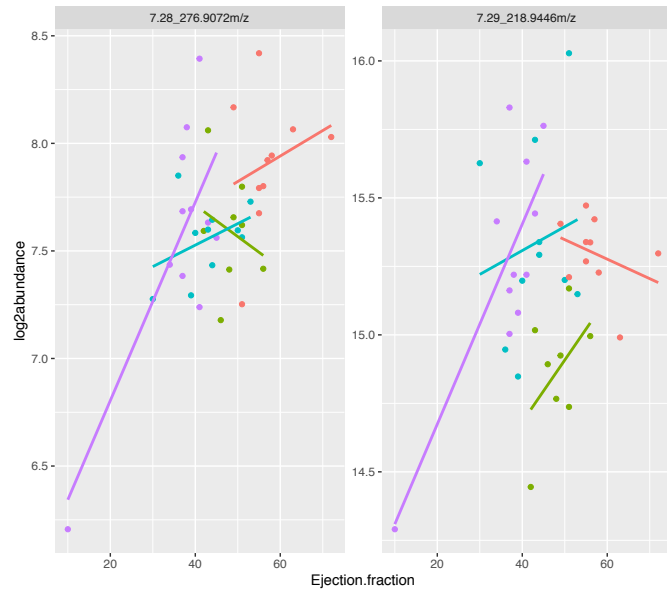

## B LVIDd, I/R\_Old group

group Sham\_Young Sham\_Old I/R\_Young I/R\_Old

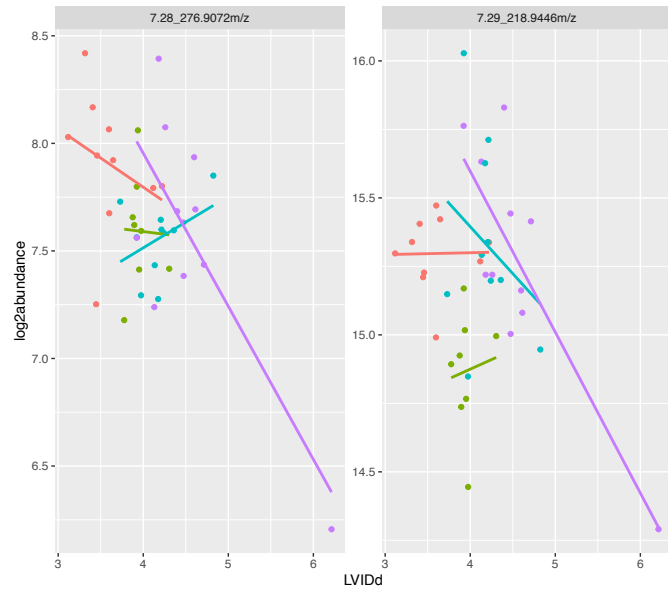

## C Reverse Radial Strain Rate, I/R\_Old group

group Sham\_Young Sham\_Old I/R\_Young I/R\_Old

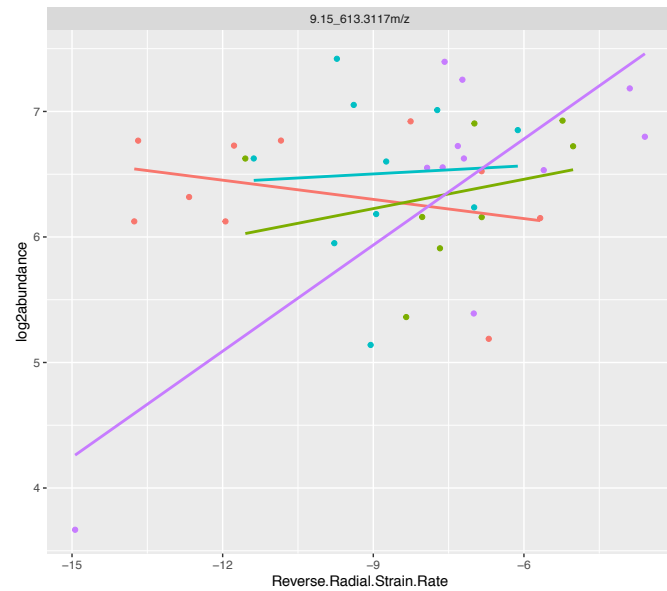

# Suppl. Figure 12:

## A Ejection fraction, I/R\_Old group

group Sham\_Young Sham\_Old I/R\_Young I/R\_Old

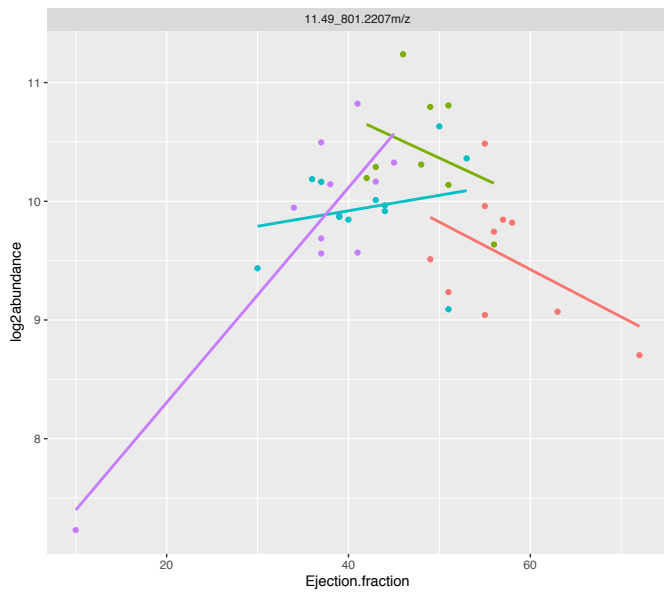

## B LVIDd, I/R\_Old group

group Sham\_Young Sham\_Old I/R\_Young I/R\_Old

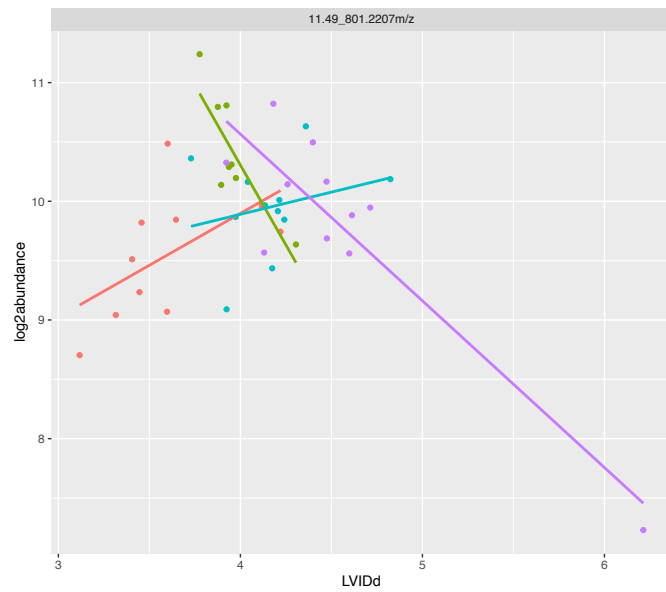

## C Reverse Radial Strain Rate, I/R\_Old group

group Sham\_Young Sham\_Old I/R\_Young I/R\_Old

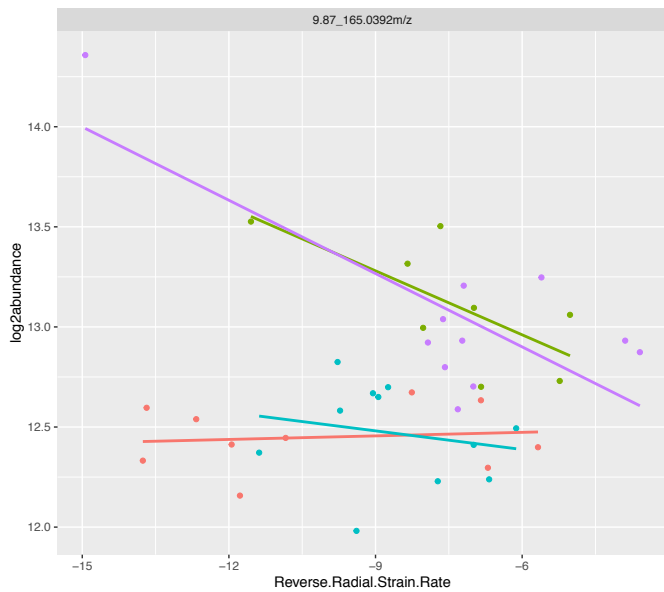

## D Reverse Longitudinal Strain Rate, Sham\_Young

group Sham\_Young Sham\_Old I/R\_Young I/R\_Old

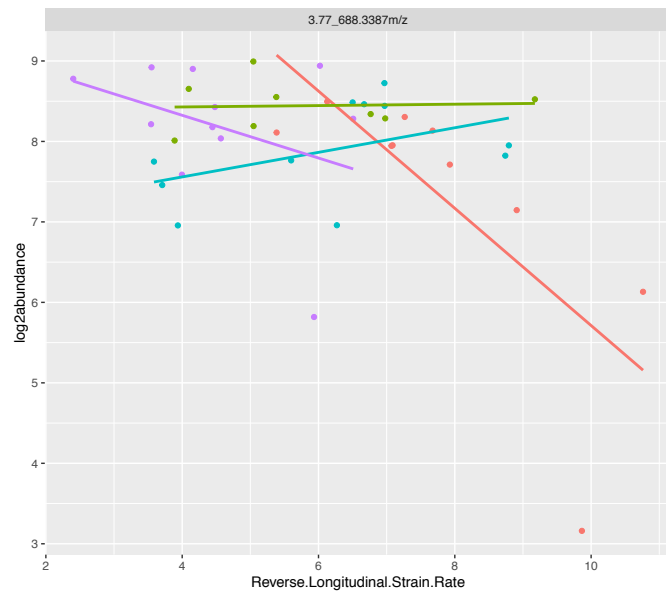

Supplement: ACEL-20-e13284-s001.pdf [file ACEL-20-e13284-s001.pdf]
